# Supplementary material for: Synergistic combination of amorphous indium oxide with tantalum pentoxide for efficient electron transport in low-power electronics
Source: Royal Society of Chemistry journal article supplement (doi:10.1039/c9tc00054b), 2019-01-01
Supplement: c9tc00054b1.pdf [file c9tc00054b1.pdf]

Supporting Information for

**Synergistic Combination of Amorphous Indium Oxide with Tantalum Pentoxide for Efficient Electron Transport in Low-Power Electronics**

Song Yi Park<sup>†a</sup>, Jungwoo Heo<sup>†b</sup>, Yung Jin Yoon<sup>a</sup>, Jae Won Kim<sup>a</sup>, Hyungsu Jang<sup>a</sup>, Bright Walker<sup>\*c</sup> and Jin Young Kim<sup>\*a,b</sup>

<sup>a</sup>Department of Energy Engineering, Ulsan National Institute of Science and Technology (UNIST), Ulsan 44919, South Korea.

<sup>b</sup>Department of Physics, Ulsan National Institute of Science and Technology (UNIST), Ulsan 44919, South Korea. E-mail: [jykim@unist.ac.kr](mailto:jykim@unist.ac.kr)

<sup>c</sup>Department of Chemistry, Kyung Hee University, Seoul 02447, South Korea. E-mail: [walker@khu.ac.kr](mailto:walker@khu.ac.kr)

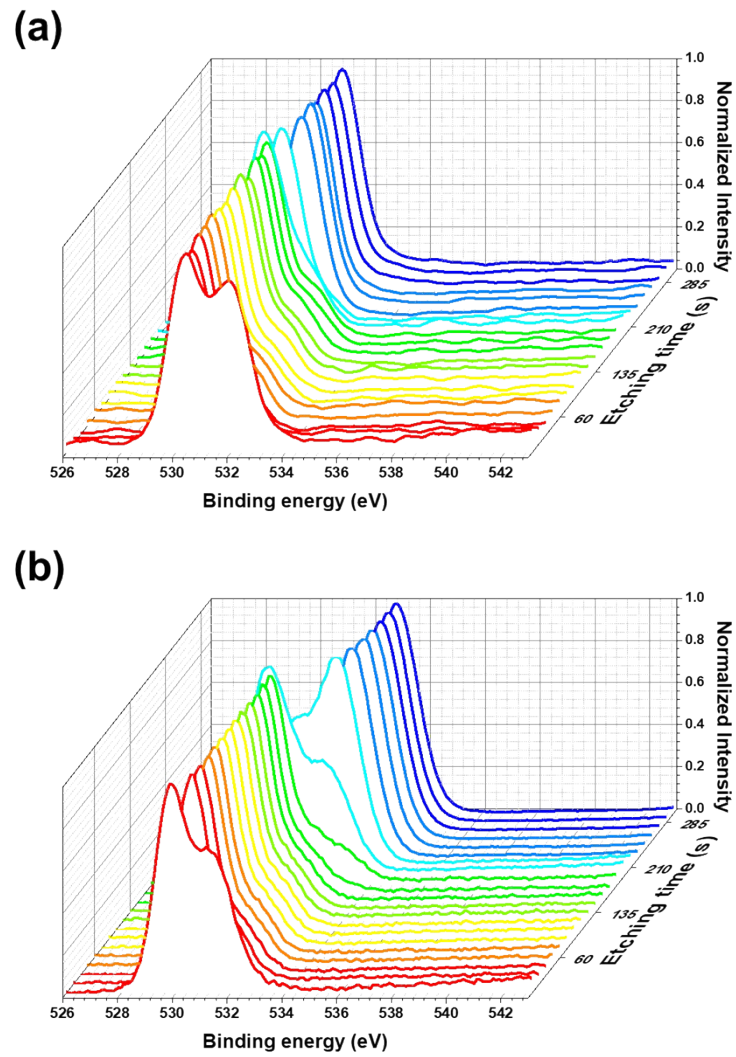

**Fig. S1.** O1s depth profile of (a) Ta<sub>2</sub>O<sub>5</sub>/In<sub>2</sub>O<sub>3</sub> thin film stack and (b) SiO<sub>2</sub>/In<sub>2</sub>O<sub>3</sub> thin film stack in which the In<sub>2</sub>O<sub>3</sub> layer was annealed at 300 °C for 5 minutes and 1 hour, respectively.

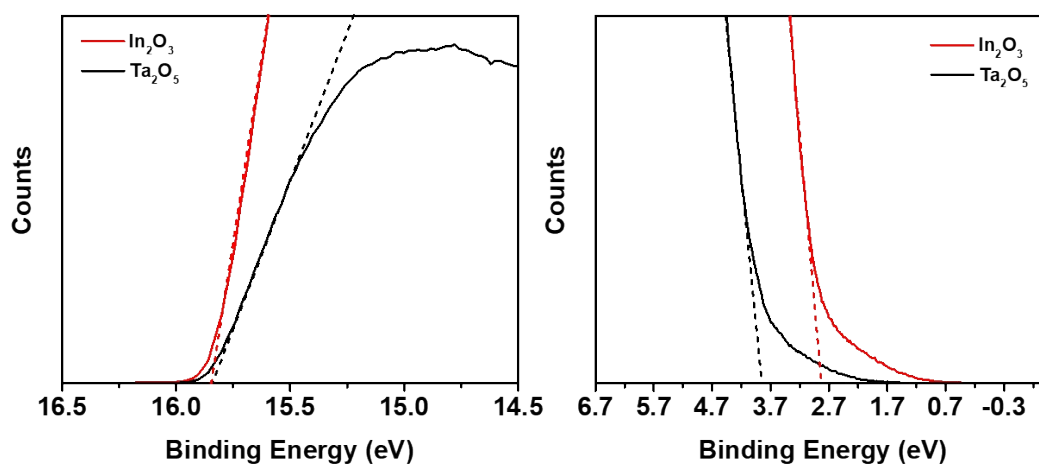

**Fig. S2.** Ultraviolet photoelectron spectra (UPS) of  $\text{In}_2\text{O}_3$  and  $\text{Ta}_2\text{O}_5$  thin films prepared on ITO substrates ( $E_{\text{WF}} = 4.7 \text{ eV}$ ).

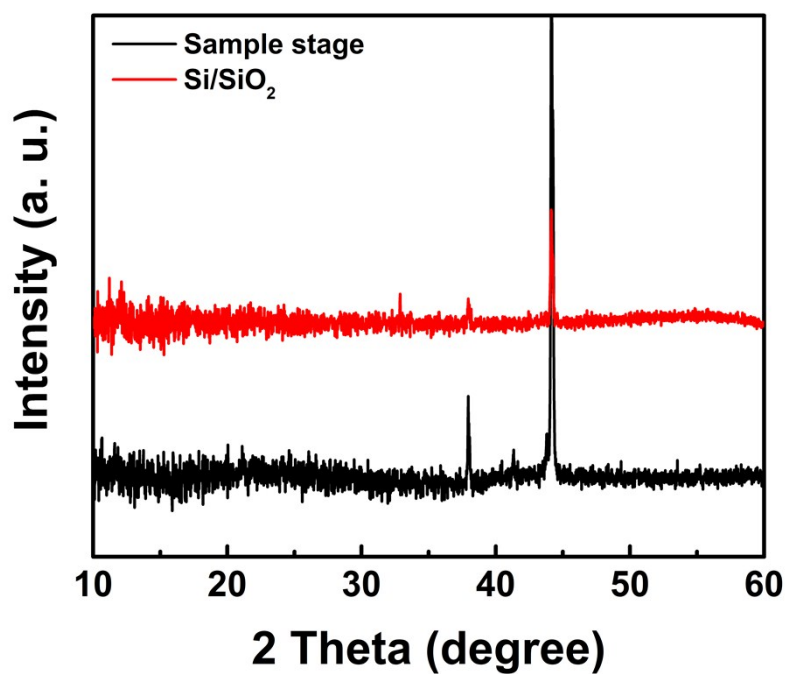

**Fig. S3.** XRD patterns corresponding to the sample stage and an  $\text{Si}/\text{SiO}_2$  substrate.

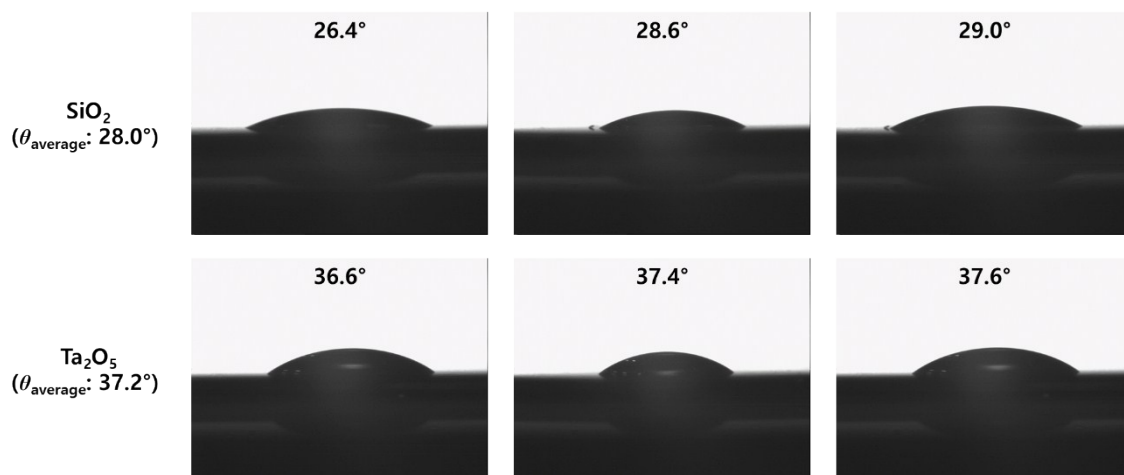

**Fig. S4.** Contact angles of 2-methoxyethanol droplets on dielectric ( $\text{SiO}_2$  and  $\text{Ta}_2\text{O}_5$ ) surfaces.

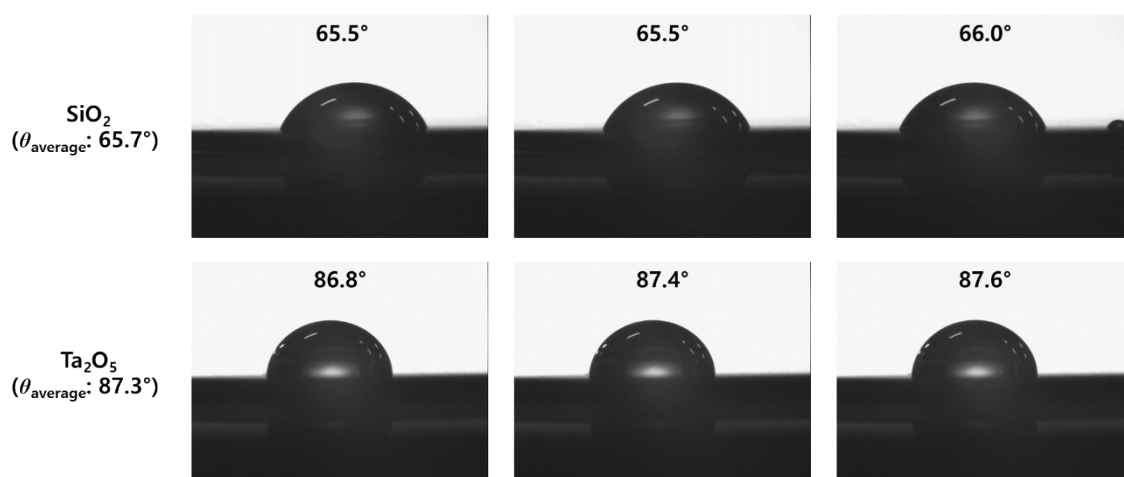

**Fig. S5.** Contact angles of water droplets on dielectric ( $\text{SiO}_2$  and  $\text{Ta}_2\text{O}_5$ ) surfaces.

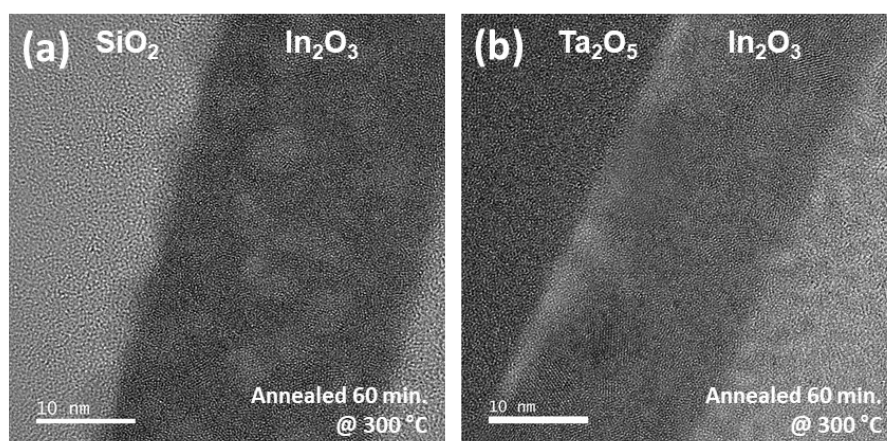

**Fig. S6.** High-magnification, cross-sectional TEM images of (a)  $\text{SiO}_2/\text{In}_2\text{O}_3$  and (b)  $\text{Ta}_2\text{O}_5/\text{In}_2\text{O}_3$  samples annealed for 60 minutes at  $300\text{ }^\circ\text{C}$ .

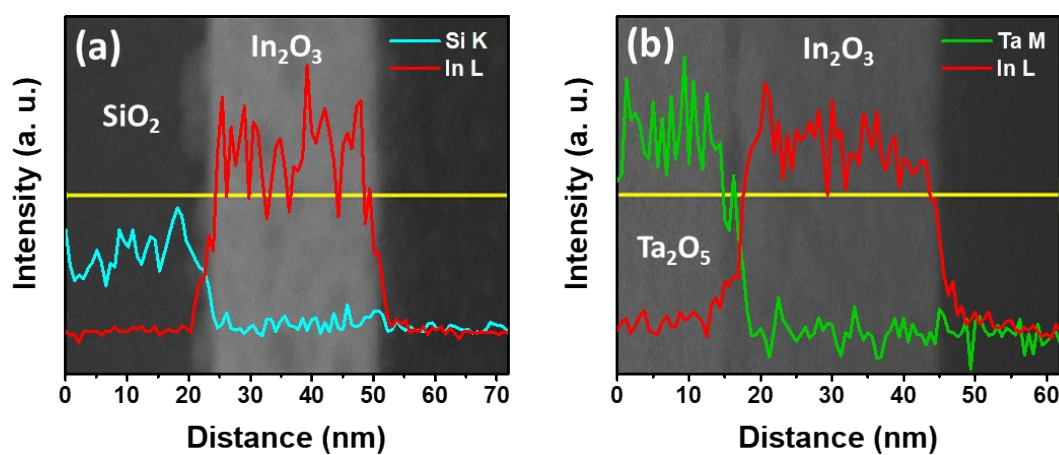

**Fig. S7.** Energy-dispersive X-ray spectroscopy (EDS) line profiles of (a)  $\text{SiO}_2/\text{In}_2\text{O}_3$  and (b)  $\text{Ta}_2\text{O}_5/\text{In}_2\text{O}_3$  samples. Background images are corresponding scanning TEM (STEM) images.

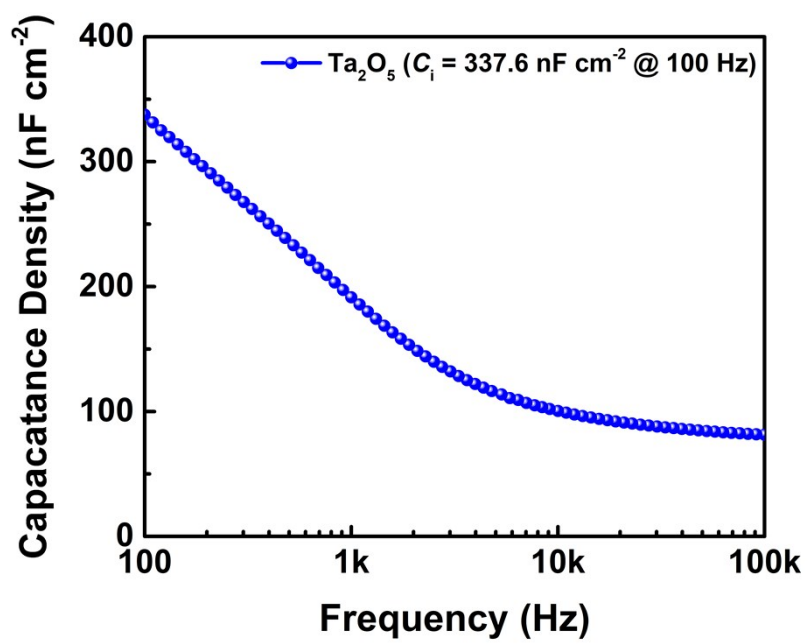

**Fig. S8.** Capacitance density – frequency ( $C$ - $f$ ) curve of Ta<sub>2</sub>O<sub>5</sub> dielectric layer

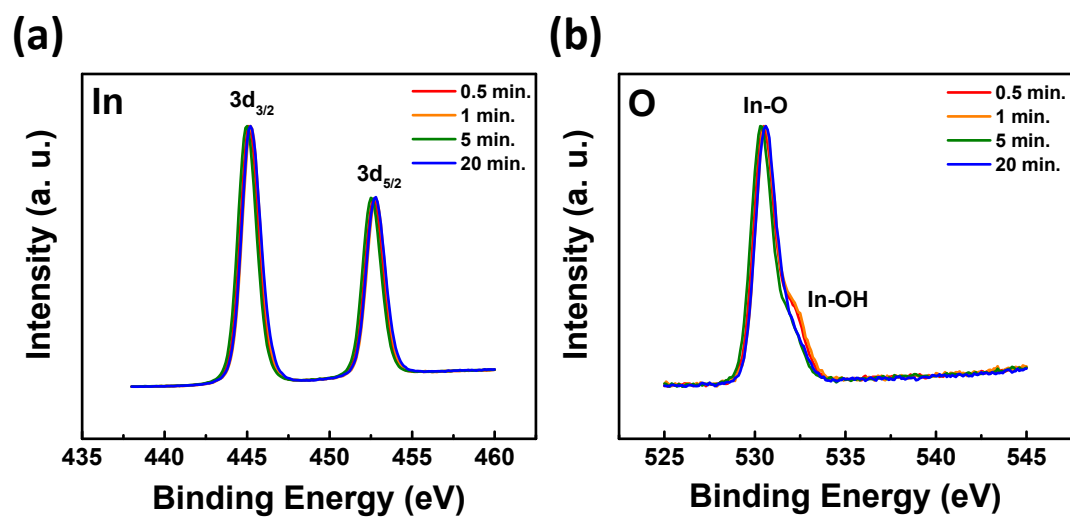

Fig. S9. XPS spectra for  $\text{In}_2\text{O}_3$  films for In 3d and O 1s with various annealing time.

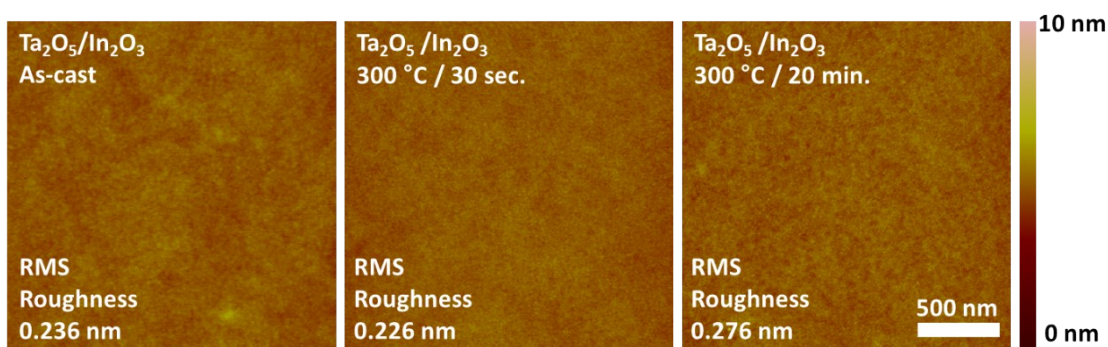

Fig. 10. AFM topographical images for  $\text{Ta}_2\text{O}_5/\text{In}_2\text{O}_3$  films with different annealing time

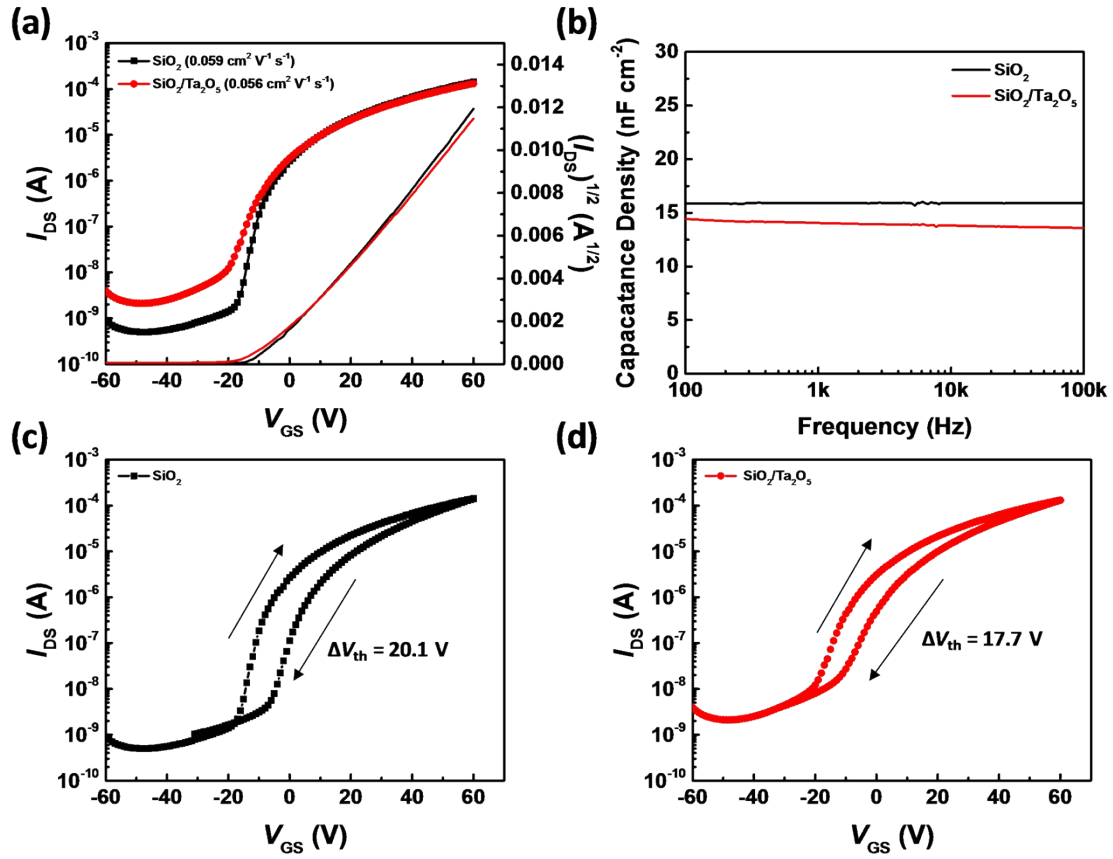

**Fig. S11.** (a) Transfer curves of  $\text{In}_2\text{O}_3$  TFTs with different dielectric;  $\text{SiO}_2$  and  $\text{SiO}_2/\text{Ta}_2\text{O}_5$ . Both devices were fabricated with annealing at  $300 \text{ }^\circ\text{C}$  for 5 minutes, to avoid damage of  $\text{Ta}_2\text{O}_5$  layer during annealing process. (b) Capacitance – frequency curves for  $\text{SiO}_2$  and  $\text{SiO}_2/\text{Ta}_2\text{O}_5$ . (c, d) Hysteresis curves for  $\text{SiO}_2$  and  $\text{SiO}_2/\text{Ta}_2\text{O}_5$  devices, respectively.



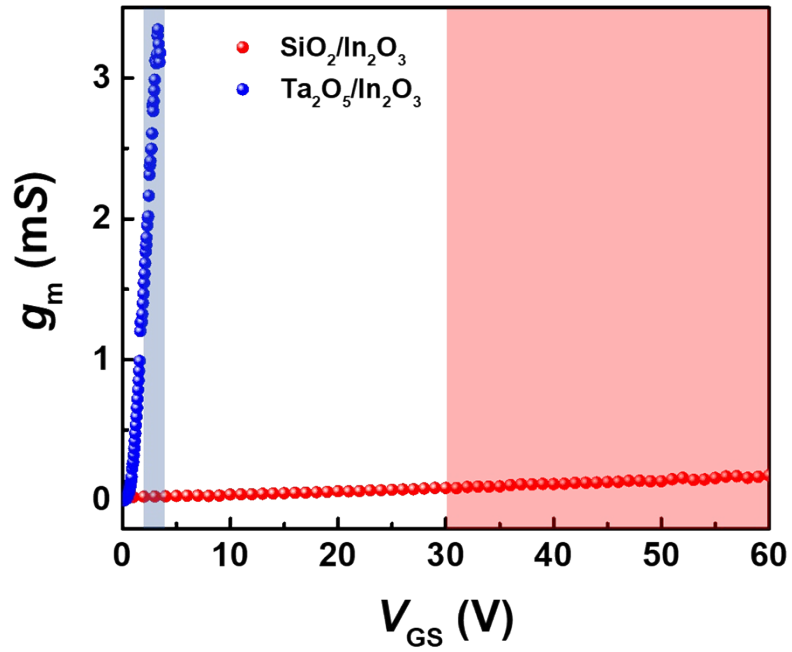

**Fig. S12.** Transconductance,  $g_m$  versus  $V_{GS}$  of two devices. The values were acquired from the curves shown in **Fig. 4a** and **4c**. Shaded area indicates the region where field effect mobilities of the devices are constant.

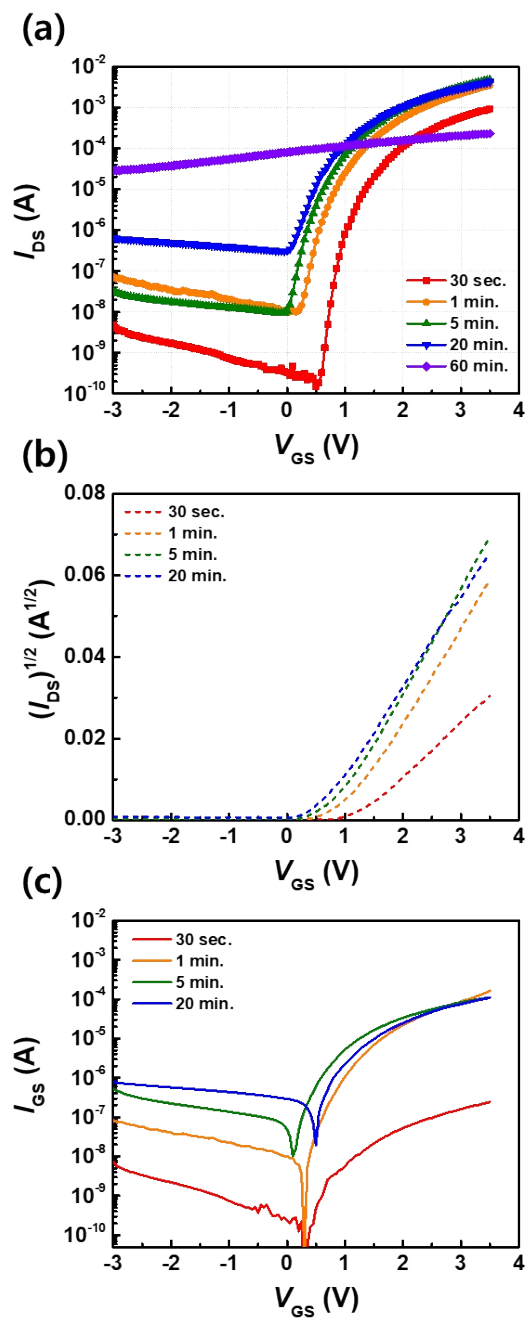

**Fig. S13.** (a) Transfer, (b) output and (c) gate leakage current characteristics of Ta<sub>2</sub>O<sub>5</sub>/In<sub>2</sub>O<sub>3</sub> TFTs annealed for various lengths of time.

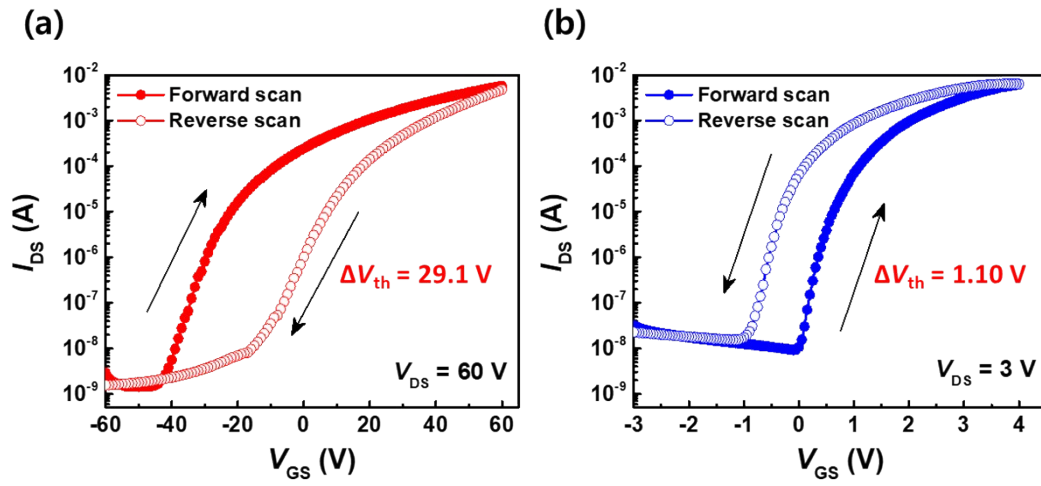

**Fig. S14.** Hysteresis characteristics for (a)  $\text{SiO}_2/\text{In}_2\text{O}_3$  and (b)  $\text{Ta}_2\text{O}_5/\text{In}_2\text{O}_3$  TFTs.
